# Supplementary material for: Synthesis and Application of Salicylhydrazone Probes with High Selectivity for Rapid Detection of Cu2+
Source: MDPI journal article supplement (doi:10.3390/molecules29092032), 2024-04-28
Supplement: s1 [file s1]

# Synthesis and Application of Salicylhydrazone Probes with High Selectivity for Rapid Detection of Cu<sup>2+</sup>

Tianzhu Shi <sup>1,2,\*</sup>, Zhengfeng Xie <sup>2</sup>, Xinliang Mo <sup>1</sup>, Yulong Feng <sup>1,\*</sup>, Tao Peng <sup>1</sup>, Fuyong Wu <sup>1</sup>, Mei Yu <sup>1</sup>, Jingjing Zhao <sup>1</sup>, Li Zhang <sup>1</sup> and Ju Guo <sup>1</sup>

<sup>1</sup> Department of Brewing Engineering, Moutai Institute, Renhuai 564500, China; xinliangmo@163.com (X.M.); edificztony@126.com (T.P.); wufuyong@mtxy.edu.cn (F.W.); yumei@mtxy.edu.cn (M.Y.); zhaojingjing0613@163.com (J.Z.); zhangli0026@126.com (L.Z.); guoju@mtxy.edu.cn (J.G.)

<sup>2</sup> Oil & Gas Field Applied Chemistry Key Laboratory of Sichuan Province, College of Chemistry and Chemical Engineering, Southwest Petroleum University, Chengdu 610500, China; xiezhf@swpu.edu.cn

\* Correspondence: shitianzhu@mtxy.edu.com (T.S.); fengyulong@mtxy.edu.com (Y.F.);  
Tel.: +86-185-8642-0308 (T.S.); +86-185-8573-8701 (Y.F.)

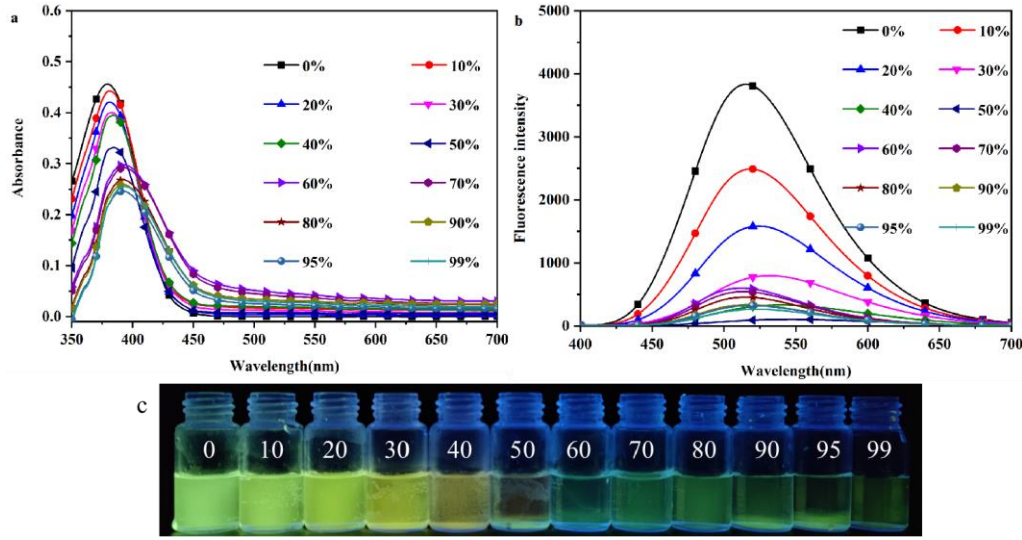

Figure S1 Ultraviolet absorption spectra (a) and Fluorescence emission spectra (b) of DHBVMH ( $1 \times 10^{-5}$  M) in different ratios of H<sub>2</sub>O/DMSO; (c) Physical images of DHBVMH ( $1 \times 10^{-5}$  M) in different ratios of H<sub>2</sub>O/DMSO under UV lamp (365 nm) irradiation.

The Lippert-Mataga equation [1]

$$\Delta\nu = \nu_A - \nu_F = \frac{2\Delta\mu^2\Delta f}{hc a_0^3} + \text{const} \quad (\text{S1})$$

$$\Delta\mu = \mu_e - \mu_g \quad (\text{S2})$$

$$\Delta f = \frac{\varepsilon - 1}{2\varepsilon + 1} - \frac{n^2 - 1}{2n^2 + 1} \quad (\text{S3})$$

$$a_0 = \sqrt[3]{\frac{3M}{4N\pi d}} \quad (\text{S4})$$

where  $\Delta\nu$  is the Stokes shift (in  $\text{cm}^{-1}$ ) between the absorption and fluorescence emission peak,  $h$  is the Planck constant,  $c$  is the velocity of light in vacuum,  $\Delta\mu$  is the transition dipole moments between the ground ( $\mu_g$ ) and excited ( $\mu_e$ ) states,  $\Delta f$  is the orientation polarizability of the solvents expressed by the dielectric constant ( $\varepsilon$ ) and refractive index ( $n$ ) of the solvents and  $a_0$  is the Onsager cavity radius, which can be derived from the Avogadro number  $N$ , molecular weight  $M$ , and density  $d$  ( $d = 1.0 \text{ g/cm}^3$ ). The Onsager cavity radius ( $a_0$ ) of DHBVMH was calculated to be 5.83 nm according to the equation (S4).

Obviously, the experimental data do not obey the linear relationship predicted by the Lippert-Mataga equation well, in the whole range of solvent polarity, as shown in Figure S2. A transformation in the slope of the fitted line is observed between the toluene ( $f=0.014$ ) and ethanol ( $f=0.295$ ) solvents. Through the analysis of the fitted line in high-polarity solvents, a slope value of  $\approx 4095.08$  ( $R^2=0.77$ ) was obtained.

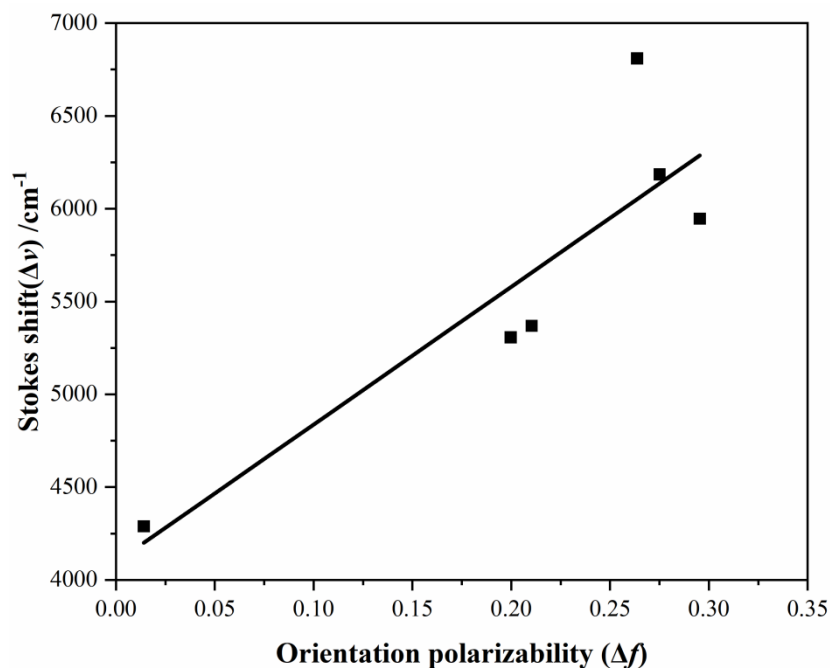

Figure S2 Lippert–Mataga plot for DHBVMH in various solvents.

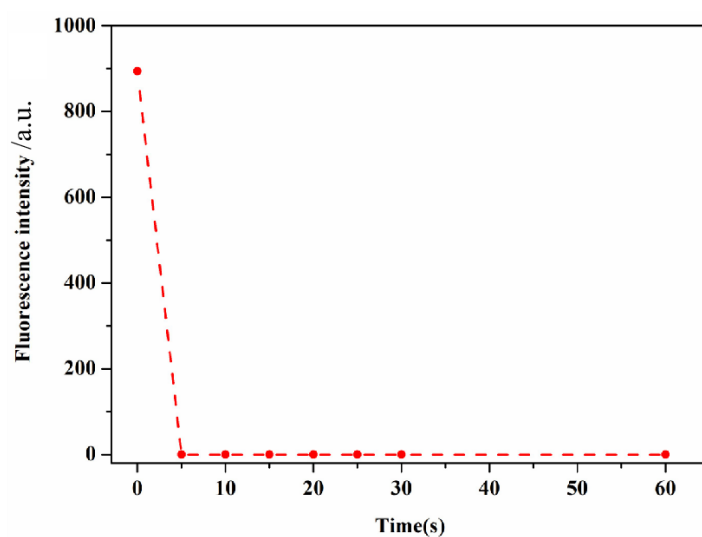

Figure S3 DHBVMH( $1 \times 10^{-5}$  M, DMSO/ $\text{H}_2\text{O}$ ,  $v/v=7/3$ ,  $\text{pH}=7.0$ , Cys:  $1 \times 10^{-4}$  M) recognition  $\text{Cu}^{2+}$  ion response time.

### Optical study

The maximum UV absorption wavelength of DHBVMH in different polar organic solvents (toluene, ethyl acetate, THF, ethanol, DMF, and DMSO) was used as the excitation wavelength for measuring the fluorescence wavelength. UV-vis spectra were recorded using UV-2450 type ultraviolet-visible spectrophotometer. Photoluminescence (PL) spectra were obtained using RF-5301PC fluorescence spectrophotometer. The

photoluminescence quantum yields (QY) in solutions were determined by comparing to quinine sulfate in 0.10 M H<sub>2</sub>SO<sub>4</sub> at room temperature as a standard. The QY in solid states were obtained on a HORIBA Fluorolog-3 spectrophotometer equipped with an integrating sphere.

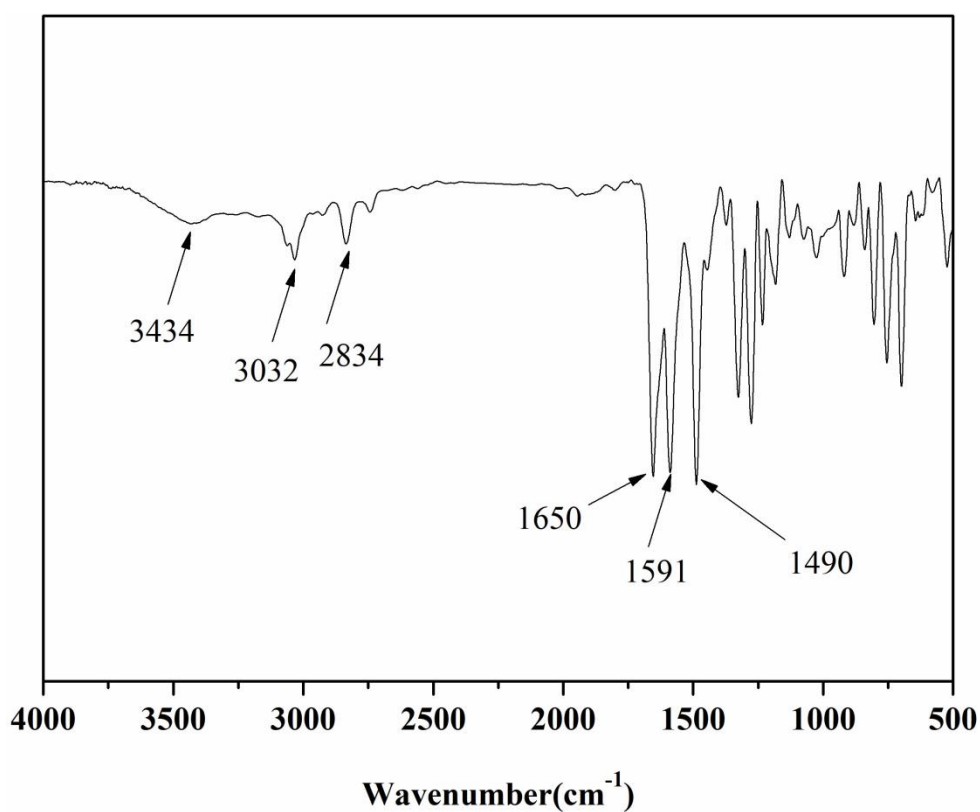

Figure S4 FT-IR of DHB

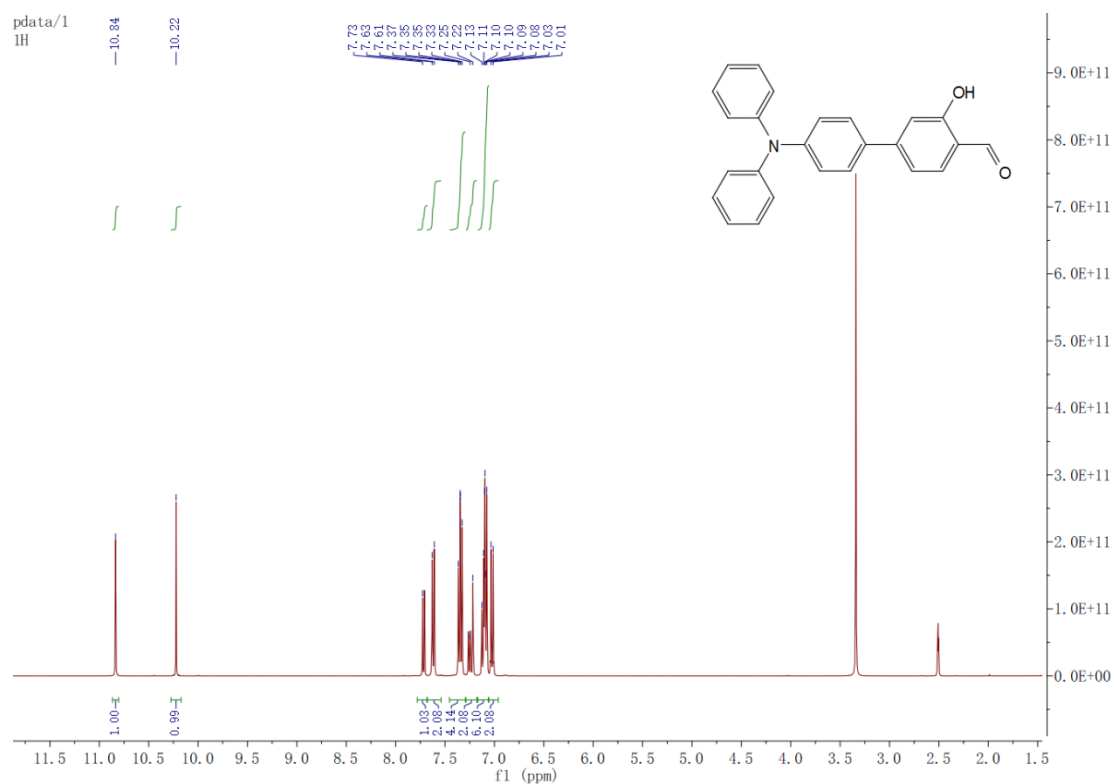

Figure S5  $^1\text{H}$  NMR (400 MHz,  $\text{DMSO}-d_6$ ) spectrum of DHB

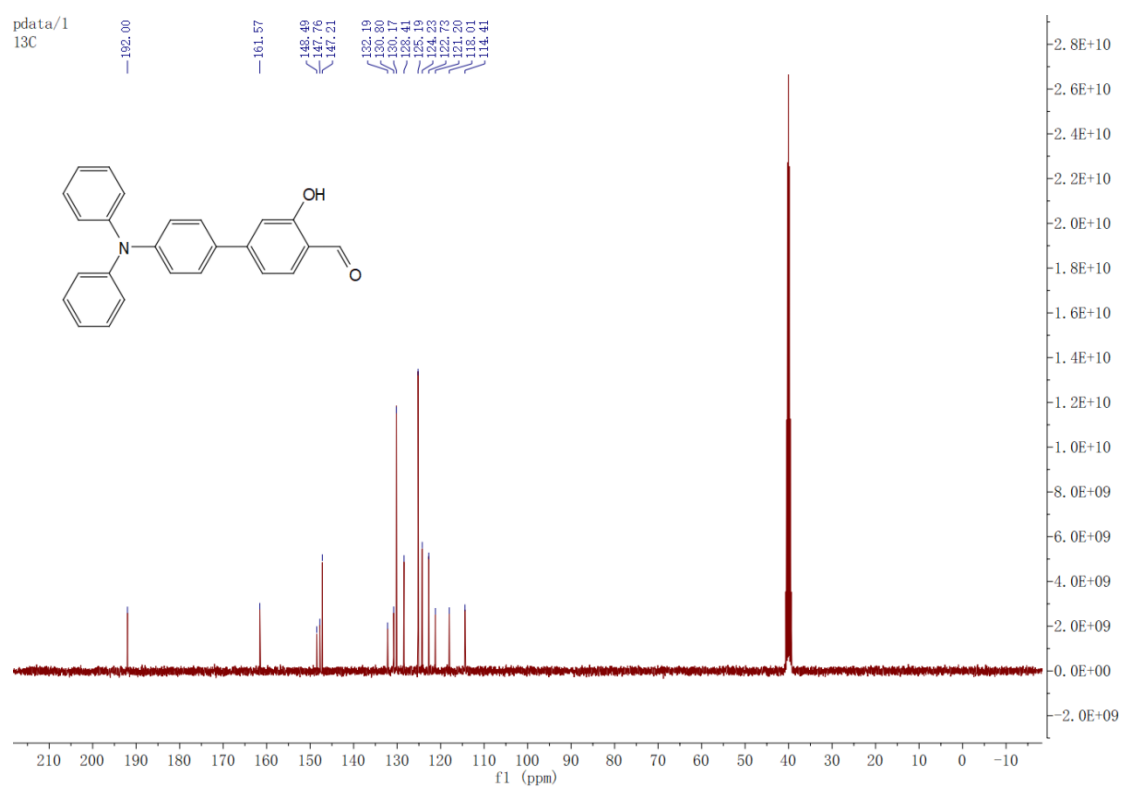

Figure S6  $^{13}\text{C}$  NMR (101 MHz,  $\text{DMSO}-d_6$ ) spectrum of DHB

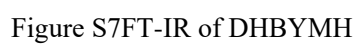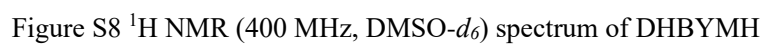

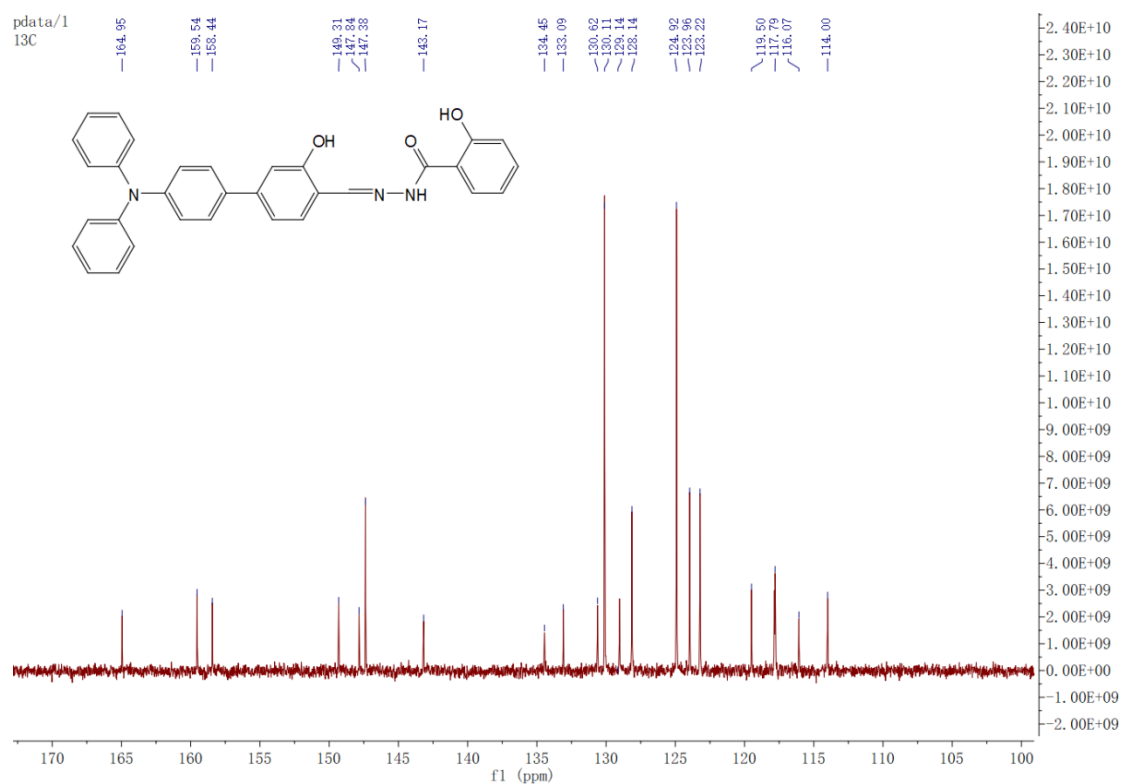

Figure S9  $^{13}\text{C}$  NMR (101 MHz,  $\text{DMSO}-d_6$ ) spectrum of DHBVMH

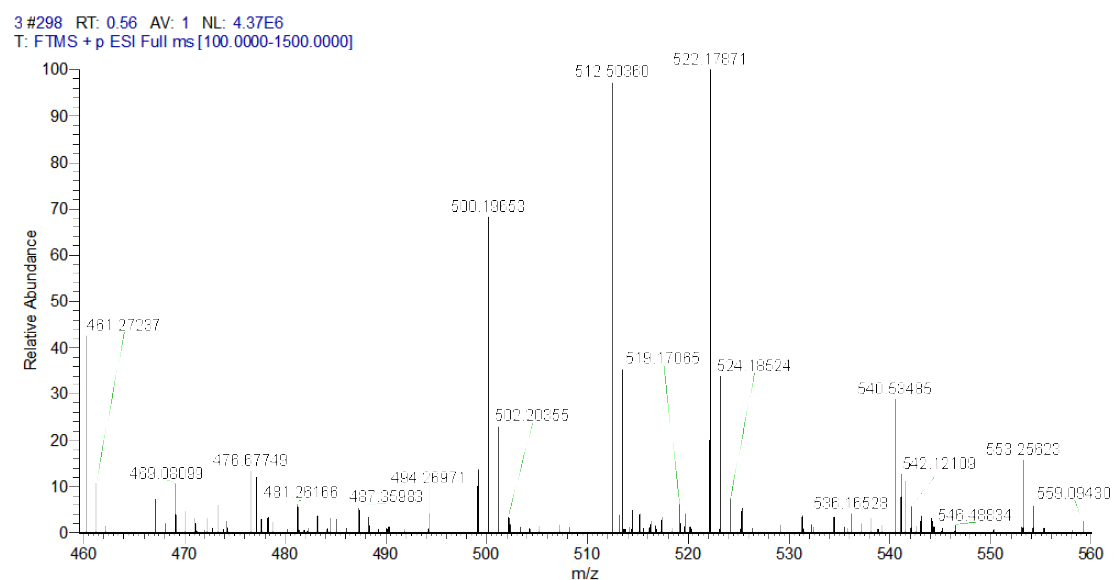

Figure S10 HR-MS spectra of DHBVMH

Table S1. The Stokes shift of DHBVMH in various solvents with a range of  $\Delta f$  (orientation polarizability) values.

| DHBVMH        | $\lambda_{abs}(nm)$ | $\lambda_{em}(nm)$ | $n$     | Stokes shift( $cm^{-1}$ ) | $\epsilon$ | $f$   |
|---------------|---------------------|--------------------|---------|---------------------------|------------|-------|
| Toluene       | 380                 | 454                | 1.494   | 4289                      | 2.38       | 0.014 |
| Ethyl acetate | 380                 | 476                | 1.372   | 5307                      | 6.02       | 0.199 |
| THF           | 381                 | 479                | 1.405   | 5369                      | 7.58       | 0.210 |
| Ethanol       | 386                 | 501                | 1.354   | 5946                      | 28.4       | 0.295 |
| DMF           | 390                 | 514                | 1.42817 | 6185                      | 36.7       | 0.275 |
| DMSO          | 384                 | 520                | 1.4795  | 6810                      | 48.9       | 0.264 |

Table S2 Comparison of probe DHBVMH with other  $Cu^{2+}$  probes reported.

| Probe                                                                               | Solvent (V:V)                                | LOD/(mol•<br>$L^{-1}$ ) | pH  | Time   | Cell           | Ref. |
|-------------------------------------------------------------------------------------|----------------------------------------------|-------------------------|-----|--------|----------------|------|
| 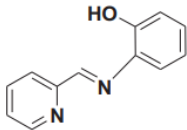 | H <sub>2</sub> O/methanol<br>(9:1 v/v)       | $2.00 \times 10^{-5}$   | 7   | 60 s   | —              | [2]  |
|  | CH <sub>3</sub> CN/H <sub>2</sub> O<br>(1:1) | $5.80 \times 10^{-8}$   | 7.2 | 1 h    | MCF-7<br>cells | [3]  |
|  | ACN/PBS (4:6)                                | $1.57 \times 10^{-7}$   | 7.4 | —      | Hela<br>cells  | [4]  |
|  | CH <sub>3</sub> CN/HEPES<br>(4:1)            | $3.20 \times 10^{-7}$   | 7.4 | 20 min | 293 T<br>cells | [5]  |
|  | CH <sub>3</sub> CN/HEPES<br>(1:9)            | $2.19 \times 10^{-7}$   | 7.0 | 11 min | HepG2<br>cells | [6]  |



|                                                                                     |                                              |                            |          |       |                       |      |
|-------------------------------------------------------------------------------------|----------------------------------------------|----------------------------|----------|-------|-----------------------|------|
| 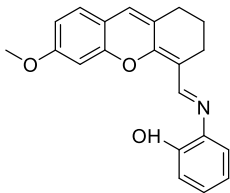   | CH <sub>3</sub> CN/HEPES<br>(4:1)            | $3.30 \times 10^{-5}$      | 7.3      | —     | HepG2<br>cells        | [7]  |
|    | H <sub>2</sub> O                             | $4.48 \times 10^{-6}$      | 4.2-10.5 | 150 s | Caco-2<br>cells       | [8]  |
|    | EtOH-H <sub>2</sub> O = 1:1                  | $1.62 \times 10^{-6}$      | —        | —     | —                     | [9]  |
|    | PBS buffer/<br>EtOH (1:1)                    | 0.11 μM                    | 7.4      | 120s  | —                     | [10] |
|   | CH <sub>3</sub> CN/H <sub>2</sub> O<br>(1/1) | $2.9 \times 10^{-7}$       | 1.0-3.5  | —     | —                     | [11] |
|  | DMSO/H <sub>2</sub> O<br>(7/3)               | $1.62 \times 10^{-7}$<br>M | 7.0      | 5s    | <b>This<br/>study</b> |      |

1. Cao, J.; Liu, Q.-M.; Bai, S.-J.; Wang, H.-C.; Ren, X.; Xu, Y.-X. Ladder-Type Dye with Large Transition Dipole Moment for Solvatochromism and Microphase Visualization. *ACS Applied Materials & Interfaces* **2019**, *11*, 29814-29820, doi:10.1021/acsami.9b07677.
2. Lina, G.; Gao, Y.; Han, L. Detecting Cu<sup>2+</sup> and H<sub>2</sub>O in methanol based on aggregation-induced emission fluorescent enhancement. *Journal of Coordination Chemistry* **2021**, *74*, 1284-1297, doi:10.1080/00958972.2021.1897114.
3. Zhang, Z.; Liu, Y.; Wang, E. A highly selective “turn-on” fluorescent probe for detecting Cu<sup>2+</sup> in two different sensing mechanisms. *Dyes and Pigments* **2019**, *163*, 533-537, doi:10.1016/j.dyepig.2018.12.039.
4. Yin, J.; Wang, Z.; Zhao, F.; Yang, H.; Li, M.; Yang, Y. A novel dual functional pyrene-based turn-on fluorescent probe for hypochlorite and copper (II) ion detection and bioimaging applications. *Spectrochimica Acta Part A: Molecular and Biomolecular Spectroscopy* **2020**, *239*, doi:10.1016/j.saa.2020.118470.
5. Fu, Y.; Pang, X.-X.; Wang, Z.-Q.; Chai, Q.; Ye, F. A highly sensitive and selective fluorescent probe for determination of Cu (II) and application in live cell imaging. *Spectrochimica Acta Part A: Molecular and Biomolecular Spectroscopy* **2019**, *208*, 198-205, doi:10.1016/j.saa.2018.10.005.

6. Jiang, N.; Gong, X.; Zhong, T.; Zheng, Y.; Wang, G. A highly selective and sensitive “turn-on” fluorescent probe for rapid recognition and detection of Cu<sup>2+</sup> in aqueous solution and in living cells. *Journal of Molecular Structure* **2020**, *1219*, doi:10.1016/j.molstruc.2020.128573.
7. Li, B.; Kou, J.; Mei, H.; Gu, X.; Wang, M.; Xie, X.; Xu, K. A hemicyanine-based “turn-on” fluorescent probe for the selective detection of Cu<sup>2+</sup> ions and imaging in living cells. *Analytical Methods* **2020**, *12*, 4181-4184, doi:10.1039/d0ay01461c.
8. Zhang, C.; Wang, Y.; Li, X.; Nie, S.; Liu, C.; Zhang, Y.; Guo, J.; Liu, C. A dual functional fluorescent probe based on naphthalimide for detecting Cu<sup>2+</sup> and pH and its applications. *Inorganica Chimica Acta* **2023**, *554*, doi:10.1016/j.ica.2023.121544.
9. Yang, Y.-S.; Cao, J.-Q.; Ma, C.-M.; Zhang, Y.-P.; Guo, H.-C.; Xue, J.-J. A novel pyrazoline-based fluorescence probe armed by pyrene and naphthol system for the selective detection of Cu<sup>2+</sup> and its biological application. *Journal of the Iranian Chemical Society* **2022**, *19*, 3451-3461, doi:10.1007/s13738-022-02536-5.
10. Leng, X.; Wang, D.; Mi, Z.; Zhang, Y.; Yang, B.; Chen, F. Novel Fluorescence Probe toward Cu<sup>2+</sup> Based on Fluorescein Derivatives and Its Bioimaging in Cells. *Biosensors* **2022**, *12*, doi:10.3390/bios12090732.
11. Wang, Y.; Zhou, J.; Zhao, L.; Xu, B. A dual-responsive and highly sensitive fluorescent probe for Cu<sup>2+</sup> and pH based on a dansyl derivative. *Dyes and Pigments* **2020**, *180*, doi:10.1016/j.dyepig.2020.108513.
